# Supplementary material for: Immunonutritional Protease Inhibitors from T. durum and A. sativa Display Metabolic Similarities When Assayed on Human Macrophage-like Cells
Source: MDPI journal article supplement (doi:10.3390/ijms22158307), 2021-08-02
Supplement: s1 [file s1]

## Supplementary Materials

**Table S1.** Proteins identified by RP-LC-MS/MS in human-like macrophage cells incubated with extracts from *T. durum* and *A. sativa* compared to untreated controls.

| Nº (#) | Protein <sup>a</sup> (Accession)                                 | Mr    | pI   | Mean fold difference <sup>b</sup> |                  | P <sup>c</sup> |
|--------|------------------------------------------------------------------|-------|------|-----------------------------------|------------------|----------------|
|        |                                                                  |       |      | <i>T. durum</i>                   | <i>A. sativa</i> |                |
| 1      | Heat shock protein HSP 90-beta (P08238)                          | 83.2  | 5.03 | 1.12 ± 0.51                       | 0.88 ± 0.31      | 0.394          |
| 2      | Pyruvate kinase (P14618)                                         | 57.9  | 7.84 | 1.28 ± 0.59                       | 1.31 ± 0.46      | 0.943          |
| 3      | Polyubiquitin-C (P0CG48)                                         | 77.0  | 7.66 | 1.04 ± 0.48                       | 0.85 ± 0.30      | 0.466          |
| 4      | Transitional endoplasmic reticulum ATPase (P55072)               | 89.3  | 5.26 | 1.13 ± 0.52                       | 1.20 ± 0.43      | 0.809          |
| 5      | T-complex protein 1 subunit zeta (P40227)                        | 58.0  | 6.68 | 1.04 ± 0.48                       | 0.97 ± 0.34      | 0.793          |
| 6      | 6-phosphogluconate dehydrogenase (P52209-2)                      | 51.8  | 7.44 | 0.87 ± 0.40                       | 0.99 ± 0.35      | 0.619          |
| 7      | Ras-related protein Rab-7a (P51149)                              | 23.5  | 6.70 | 1.04 ± 0.48                       | 0.97 ± 0.34      | 0.793          |
| 8      | Aldehyde dehydrogenase (P05091-2)                                | 51.0  | 6.20 | 0.87 ± 0.40                       | 0.14 ± 0.05      | 0.004          |
| 9      | D-3-phosphoglycerate dehydrogenase (O43175)                      | 56.6  | 6.71 | 1.46 ± 1.46                       | 1.02 ± 0.36      | 0.231          |
| 10     | L-lactate dehydrogenase B chain (P07195)                         | 36.6  | 6.05 | 1.04 ± 0.48                       | 1.13 ± 0.40      | 0.753          |
| 11     | Sodium/potassium-transporting ATPase (P05023-3)                  | 109.5 | 5.31 | 2.35 ± 1.07                       | 1.48 ± 0.53      | 0.146          |
| 12     | Fructose-bisphosphate aldolase A (P04075)                        | 39.4  | 8.09 | 1.34 ± 0.61                       | 1.33 ± 0.47      | 0.989          |
| 13     | Annexin A5 (P08758)                                              | 35.9  | 5.05 | 1.46 ± 0.67                       | 1.36 ± 0.48      | 0.793          |
| 14     | Macrophage-capping protein (P40121-2)                            | 36.8  | 7.20 | 1.04 ± 0.48                       | 0.85 ± 0.30      | 0.467          |
| 15     | Dolichyl-diphosphooligosaccharide-glycosyltransferase (P39656-3) | 49.0  | 6.86 | 1.04 ± 0.48                       | 0.68 ± 0.24      | 0.167          |
| 16     | Nucleoside diphosphate kinase A (P15531)                         | 17.1  | 6.19 | 1.30 ± 0.60                       | 0.42 ± 0.15      | 0.013          |
| 17     | T-complex protein 1 subunit delta (P50991)                       | 57.9  | 7.83 | 0.59 ± 0.27                       | 0.60 ± 0.21      | 0.944          |
| 18     | Ubiquitin-like modifier-activating enzyme 1 (P22314-2)           | 113.7 | 5.60 | 0.62 ± 0.29                       | 1.02 ± 0.36      | 0.092          |
| 19     | Serine hydroxymethyltransferase (P34897-3)                       | 53.4  | 8.15 | 1.04 ± 0.48                       | 0.85 ± 0.30      | 0.466          |
| 20     | Serine/threonine kinase receptor-associated protein (Q9Y3F4)     | 38.4  | 5.12 | 0.78 ± 0.36                       | 0.42 ± 0.15      | 0.074          |
| 21     | Glucose-6-phosphate isomerase (P06744)                           | 63.1  | 8.32 | 0.69 ± 0.32                       | 0.85 ± 0.30      | 0.453          |

|    |                                                                                     |       |      |                 |                 |       |
|----|-------------------------------------------------------------------------------------|-------|------|-----------------|-----------------|-------|
| 22 | T-complex protein 1 subunit $\alpha$ (P17987)                                       | 60.3  | 6.11 | $1.04 \pm 0.48$ | $1.13 \pm 0.40$ | 0,753 |
| 23 | Chloride intracellular channel protein 1 (O00299)                                   | 26.9  | 5.17 | $1.04 \pm 0.48$ | $0.56 \pm 0.20$ | 0,074 |
| 24 | Nascent polypeptide-associated complex subunit $\alpha$ (Q13765)                    | 23.4  | 4.56 | $0.69 \pm 0.32$ | $0.85 \pm 0.30$ | 0,453 |
| 25 | Rho GDP-dissociation inhibitor 1 (P52565)                                           | 23.2  | 5.11 | $2.08 \pm 0.95$ | $0.80 \pm 0.30$ | 0,025 |
| 26 | Glucose-6-phosphate 1-dehydrogenase (P11413)                                        | 59.2  | 6.84 | $1.67 \pm 0.76$ | $0.68 \pm 0.24$ | 0.025 |
| 27 | Glyceraldehyde-3-phosphate dehydrogenase (P04406)                                   | 36.0  | 8.46 | $0.69 \pm 0.32$ | $0.56 \pm 0.20$ | 0.467 |
| 28 | Dihydrolipoyl dehydrogenase (P09622-2)                                              | 43.6  | 7.03 | $1.04 \pm 0.48$ | $0.85 \pm 0.30$ | 0.467 |
| 29 | Ras-related protein Rab-10 (P61026)                                                 | 22.5  | 8.38 | $1.39 \pm 0.64$ | $1.13 \pm 0.40$ | 0.467 |
| 30 | V-type proton ATPase catalytic subunit A (P38606-2)                                 | 64.7  | 5.66 | $1.39 \pm 0.64$ | $1.13 \pm 0.40$ | 0.375 |
| 31 | Poly(rC)-binding protein 1 (Q15365)                                                 | 37.5  | 7.09 | $1.39 \pm 0.36$ | $0.85 \pm 0.30$ | 0.124 |
| 32 | Peptidyl-prolyl cis-trans isomerase FKBP4 (Q02790)                                  | 51.8  | 5.43 | $0.52 \pm 0.24$ | $0.64 \pm 0.23$ | 0.453 |
| 33 | Ras-related protein Rab-1A (P62820)                                                 | 22.7  | 6.21 | $1.74 \pm 0.79$ | $0.85 \pm 0.30$ | 0.048 |
| 34 | T-complex protein 1 subunit eta (Q99832-3)                                          | 54.8  | 7.68 | $1.39 \pm 0.64$ | $0.28 \pm 0.10$ | 0.005 |
| 35 | Ras-related protein Rab-2A (P61019-2)                                               | 20.8  | 6.11 | $1.56 \pm 0.71$ | $0.85 \pm 0.30$ | 0.074 |
| 36 | Isocitrate dehydrogenase [NADP] cytoplasmic (O75874)                                | 46.6  | 7.01 | $1.56 \pm 0.71$ | $1.70 \pm 0.45$ | 0.754 |
| 37 | Isocitrate dehydrogenase [NADP], mitochondrial (P48735-2)                           | 45.2  | 7.75 | $1.04 \pm 0.48$ | $1.80 \pm 0.60$ | 0.092 |
| 38 | Fermitin family homolog 3 (Q86UX7-2)                                                | 75.4  | 6.77 | $0.69 \pm 0.32$ | $0.85 \pm 0.30$ | 0.453 |
| 39 | Dolichyl-diphosphooligosaccharide--protein glycosyltransferase subunit 2 (P04844-2) | 67.7  | 6.06 | $1.04 \pm 0.48$ | $0.85 \pm 0.30$ | 0.532 |
| 40 | Receptor of activated protein C kinase 1 (P63244)                                   | 35.1  | 7.69 | $2.08 \pm 0.95$ | $2.12 \pm 0.75$ | 0.944 |
| 41 | Ceruloplasmin (P00450)                                                              | 122.1 | 5.72 | $1.56 \pm 0.71$ | $0.85 \pm 0.30$ | 0.074 |
| 42 | Hypoxia up-regulated protein 1 (Q9Y4L1)                                             | 111.3 | 5.22 | $1.56 \pm 0.71$ | $0.42 \pm 0.15$ | 0.008 |
| 43 | High mobility group protein B1 (P09429)                                             | 24.9  | 5.74 | $1.04 \pm 0.48$ | $1.27 \pm 0.39$ | 0.453 |
| 44 | Cell division control protein 42 homolog (P60953)                                   | 21.2  | 6.55 | $1.56 \pm 0.71$ | $1.37 \pm 0.43$ | 0.467 |
| 45 | NADPH-cytochrome P450 reductase (P16435)                                            | 76.6  | 5.58 | $1.04 \pm 0.48$ | $1.22 \pm 0.45$ | 0.453 |
| 46 | Glutamate dehydrogenase 1 (P00367-3)                                                | 46.5  | 7.08 | $1.56 \pm 0.71$ | $1.70 \pm 0.60$ | 0.754 |
| 47 | Ras GTPase-activating-like protein IQGAP1 (P46940)                                  | 189.1 | 6.48 | $2.60 \pm 1.19$ | $0.42 \pm 0.15$ | 0.004 |

|    |                                                                              |       |      |             |             |       |
|----|------------------------------------------------------------------------------|-------|------|-------------|-------------|-------|
| 48 | Proliferation-associated protein 2G4 (Q9UQ80-2)                              | 38.0  | 7.53 | 1.04 ± 0.48 | 0.11 ± 0.04 | 0.002 |
| 49 | Protein disulfide-isomerase A3 (P30101)                                      | 56.7  | 6.35 | 0.91 ± 0.42 | 0.95 ± 0.34 | 0.860 |
| 50 | GTP-binding nuclear protein Ran (P62826)                                     | 24.4  | 7.49 | 1.39 ± 0.64 | 0.56 ± 0.20 | 0.025 |
| 51 | Calnexin (P27824)                                                            | 67.5  | 4.60 | 1.56 ± 0.71 | 0.85 ± 0.30 | 0.074 |
|    | Serine/threonine-protein phosphatase 2A 55 kDa regulatory subunit B (P63151) | 51.7  | 6.20 | 1.56 ± 0.71 | 0.85 ± 0.30 | 0.074 |
| 52 |                                                                              |       |      |             |             |       |
| 53 | Apoptosis-inducing factor 1 (O95831-3)                                       | 66.3  | 8.94 | 0.69 ± 0.69 | 0.85 ± 0.30 | 0.453 |
| 54 | Phosphoglycerate kinase 1 (P00558)                                           | 44.6  | 8.10 | 0.89 ± 0.89 | 0.97 ± 0.34 | 0.753 |
| 55 | Phosphoglycerate mutase 1 (P18669)                                           | 28.8  | 7.18 | 1.19 ± 0.54 | 0.85 ± 0.30 | 0.254 |
| 56 | 40S ribosomal protein S3 (P23396)                                            | 26.7  | 9.66 | 0.92 ± 0.42 | 0.75 ± 0.27 | 0.466 |
| 57 | Rab GDP dissociation inhibitor β (P50395)                                    | 50.6  | 6.47 | 0.26 ± 0.12 | 0.42 ± 0.15 | 0.093 |
| 58 | T-complex protein 1 subunit γ (P49368)                                       | 60.5  | 6.49 | 0.13 ± 0.06 | 0.85 ± 0.30 | 0.001 |
| 59 | T-complex protein 1 subunit τ (P50990-3)                                     | 51.6  | 5.24 | 0.17 ± 0.08 | 0.14 ± 0.05 | 0.467 |
| 60 | Serine/threonine-protein phosphatase PP1-α (P62136)                          | 37.5  | 6.33 | 0.83 ± 0.38 | 0.85 ± 0.30 | 0.944 |
| 61 | T-complex protein 1 subunit β (P78371-2)                                     | 52.7  | 6.44 | 0.26 ± 0.12 | 1.06 ± 0.38 | 0.002 |
| 62 | Serine/threonine-protein phosphatase PP1-γ (P36873)                          | 37.0  | 6.54 | 0.78 ± 0.36 | 0.21 ± 0.08 | 0.008 |
| 63 | Peroxiredoxin-1 (Q06830)                                                     | 22.1  | 8.13 | 1.04 ± 0.48 | 0.97 ± 0.34 | 0.793 |
|    | Sarcoplasmic/endoplasmic reticulum calcium ATPase 2 (P16615-2)               | 109.6 | 5.36 | 0.35 ± 0.16 | 0.85 ± 0.30 | 0.011 |
| 64 |                                                                              |       |      |             |             |       |
|    | Plasminogen activator inhibitor 1 RNA-binding protein (Q8NC51-4)             | 42.4  | 8.44 | 2.08 ± 0.95 | 0.85 ± 0.30 | 0.025 |
| 65 |                                                                              |       |      |             |             |       |
| 66 | Proliferating cell nuclear antigen (P12004)                                  | 28.8  | 4.69 | 1.56 ± 0.71 | 1.06 ± 0.38 | 0.202 |
| 67 | Proteasome subunit beta type-5 (P28074)                                      | 28.5  | 6.92 | 0.26 ± 0.12 | 0.21 ± 0.08 | 0.467 |
| 68 | Splicing factor, proline- and glutamine-rich (P23246)                        | 76.1  | 9.44 | 1.74 ± 0.79 | 1.13 ± 0.40 | 0.167 |
| 69 | Prostaglandin E synthase 3 (Q15185-3)                                        | 14.9  | 4.77 | 0.52 ± 0.24 | 0.85 ± 0.30 | 0.093 |
| 70 | V-type proton ATPase subunit C1 (P21283)                                     | 43.9  | 7.46 | 0.52 ± 0.24 | 0.42 ± 0.15 | 0.467 |
| 71 | Heat shock protein HSP 90-α (P07900)                                         | 84.6  | 5.02 | 0.87 ± 0.40 | 1.07 ± 0.38 | 0.449 |

|    |                                                                                     |       |       |             |             |       |
|----|-------------------------------------------------------------------------------------|-------|-------|-------------|-------------|-------|
| 72 | RuvB-like 1 (Q9Y265)                                                                | 42.1  | 6.38  | 1.39 ± 0.64 | 0.56 ± 0.20 | 0.025 |
| 73 | Phospholipase A-2-activating protein (Q9Y263)                                       | 50.2  | 6.42  | 2.08 ± 0.95 | 0.85 ± 0.30 | 0.035 |
| 74 | Ras-related protein Rab-14 (P61106)                                                 | 87.1  | 6.37  | 3.12 ± 1.43 | 2.55 ± 0.90 | 0.467 |
| 75 | Prolyl endopeptidase (P48147)                                                       | 23.9  | 6.21  | 2.08 ± 0.95 | 2.32 ± 0.70 | 0.453 |
| 76 | V-type proton ATPase subunit B (P21281)                                             | 80.6  | 5.86  | 3.12 ± 1.43 | 1.70 ± 0.60 | 0.074 |
| 77 | Ras-related protein Rab-6A (P20340)                                                 | 56.5  | 5.81  | 2.08 ± 0.95 | 0.85 ± 0.30 | 0.025 |
| 78 | Dolichyl-diphosphooligosaccharide-protein<br>glycosyltransferase subunit 1 (P04843) | 23.6  | 5.54  |             |             |       |
|    | Mitochondrial import receptor subunit TOM40 homolog<br>(O96008-2)                   | 68.5  | 6.38  | 4.17 ± 1.91 | 1.70 ± 0.60 | 0.042 |
| 79 |                                                                                     |       |       | 2.08 ± 0.95 | 0.85 ± 0.30 | 0.025 |
| 80 | Inter- $\alpha$ -trypsin inhibitor heavy chain H2 (P19823)                          | 27.7  | 10.35 | 4.17 ± 1.91 | 2.55 ± 0.90 | 0.124 |
| 81 | Ras GTPase-activating protein-binding protein 1 (Q13283)                            | 106.3 | 6.85  | 2.08 ± 0.95 | 0.85 ± 0.30 | 0.025 |
| 82 | Clathrin heavy chain 1 (Q00610-2)                                                   | 187.8 | 5.69  | 2.29 ± 1.05 | 0.17 ± 0.06 | 0.002 |
| 83 | Proteasome subunit beta type-4 (P28070)                                             | 29.2  | 5.97  | 0.43 ± 0.24 | 1.27 ± 0.45 | 0.011 |
| 84 | Guanine nucleotide-binding protein G 'α' (P04899)                                   | 40.5  | 5.54  | 1.12 ± 0.51 | 0.88 ± 0.31 | 0.453 |

<sup>a</sup> Molecular mass (Mr, Da) and Swissprot accession name; <sup>b</sup> The fold change of each protein is calculated as ratio between emPAI values, stress/control;  $\text{emPAI} = 10^{\text{PAI}} - 1$  where PAI is defined as  $\text{PAI} = \text{Nobsd}/\text{Nobsbl}$  and Nobsd and Nobsbl are the number of observed peptides per protein and the number of observable peptides per protein, respectively; <sup>c</sup> P values calculated for statistical comparison between cell cultures exposed to extracts from *T. durum* or *A. sativa*.
